# Supplementary material
Source: PubMed Central journal article supplement (PMC4432917)
Supplement: Supp_Table1.pdf [file Supp_Table1.pdf]

SUPPLEMENTARY TABLE S1. THE QUALITY CRITERIA AND SCORES FOR EACH INCLUDED ARTICLE

| Criterion                                                             | Weight | Andreotti | Bassett | Braun | Buchanan | Cao | Cheng | Dennis | Deuker | Duda | Fan | Guo | Jin | Liang | Liao | Niu | Owen | Park | Parker | Schwarz | Telesford | Vaessen | Wang | Weber |    |
|-----------------------------------------------------------------------|--------|-----------|---------|-------|----------|-----|-------|--------|--------|------|-----|-----|-----|-------|------|-----|------|------|--------|---------|-----------|---------|------|-------|----|
| Clear a priori hypothesis and design                                  | 3      | ✓         | ✓       | ✓     | ✓        | ✓   | ✓     | ✓      | ✓      | ✓    | ✓   | ✓   | ✓   | ✓     | ✓    | ✓   | ✓    | ✓    | ✓      | ✓       | ✓         | ✓       | ✓    | ✓     | N  |
| Representative and appropriate sample                                 | 2      | ✓         | N       | ✓     | ✓        | ✓   | ✓     | ✓      | ✓      | ✓    | ✓   | ✓   | N   | ✓     | ✓    | ✓   | ✓    | ✓    | ✓      | ✓       | ✓         | ✓       | ✓    | ✓     | ✓  |
| Appropriate scan sequences                                            | 2      | ✓         | ✓       | ✓     | ✓        | ✓   | ✓     | ✓      | ✓      | ✓    | ✓   | ✓   | ✓   | ✓     | ✓    | ✓   | ✓    | ✓    | ✓      | ✓       | ✓         | ✓       | ✓    | ✓     | ✓  |
| Scanner strength > 1.5T                                               | 2      | ✓         | ✓       | ✓     | N        | ✓   | ✓     | ✓      | ✓      | ✓    | ✓   | ✓   | ✓   | ✓     | ✓    | ✓   | ✓    | ✓    | N      | ✓       | ✓         | ✓       | ✓    | ✓     | ✓  |
| All subjects received the same intervention using the same facilities | 1      | ✓         | ✓       | ✓     | ✓        | ✓   | ✓     | ✓      | ✓      | ✓    | ✓   | ✓   | ✓   | ✓     | ✓    | ✓   | ✓    | ✓    | ✓      | ✓       | ✓         | ✓       | ✓    | ✓     | ✓  |
| Conditions imposed on test subjects were unlikely to introduce bias   | 2      | ✓         | ✓       | ✓     | ✓        | ✓   | ✓     | ✓      | ✓      | ✓    | ✓   | ✓   | ✓   | ✓     | ✓    | ✓   | ✓    | ✓    | ✓      | ✓       | ✓         | ✓       | ✓    | ✓     | ✓  |
| Appropriate retest interval                                           | 2      | ✓         | ✓       | ✓     | ✓        | ✓   | ✓     | ✓      | ✓      | ✓    | ✓   | ✓   | ✓   | ✓     | ✓    | ✓   | ✓    | ✓    | ✓      | N       | ✓         | ✓       | ✓    | ✓     | ✓  |
| Appropriate data processing steps                                     | 2      | ✓         | ✓       | ✓     | ✓        | ✓   | ✓     | ✓      | ✓      | ✓    | ✓   | ✓   | ✓   | ✓     | ✓    | ✓   | ✓    | ✓    | ✓      | ✓       | ✓         | ✓       | ✓    | ✓     | ✓  |
| Appropriate graph construction method                                 | 2      | ✓         | ✓       | ✓     | ✓        | ✓   | ✓     | ✓      | ✓      | ✓    | ✓   | ✓   | ✓   | ✓     | ✓    | ✓   | ✓    | ✓    | ✓      | ✓       | ✓         | ✓       | ✓    | ✓     | ✓  |
| Appropriate statistics                                                | 2      | ✓         | ✓       | ✓     | ✓        | ✓   | ✓     | ✓      | N      | ✓    | ✓   | ✓   | ✓   | ✓     | ✓    | ✓   | ✓    | ✓    | ✓      | ✓       | ✓         | ✓       | ✓    | ✓     | ✓  |
| Total                                                                 | 20     | 20        | 18      | 20    | 18       | 20  | 18    | 20     | 18     | 20   | 20  | 20  | 18  | 20    | 20   | 20  | 18   | 20   | 16     | 18      | 16        | 16      | 20   | 20    | 17 |

✓, the criterion was met; N, the criterion was not met or enough information was not recorded to make a fair judgment.
